# Supplementary material
Source: PubMed Central journal article supplement (PMC4075160)

## Supplemental Data Legends

### Supplemental Tables:

#### **Supplemental Table 1. CpG sites differentially methylated between cycle phases.**

This table includes the full list of differentially methylated CpG sites between cycle phases. This is supplementary to Table 2.

#### **Supplemental Table 2. CpG sites with strong and moderate correlation in gene expression and DNA methylation.**

This table provides a longer list of CpG sites that show DNA methylation and gene expression association. This is supplementary to Table 4.

#### **(NEW DATA):**

#### **Supplemental Table 3. A selection of loci differentially methylated in eSF treated in vitro with E<sub>2</sub>+P<sub>4</sub> vs. E<sub>2</sub>.**

This table provides a selected list of genes exhibiting differential DNA methylation when human eSF were treated with E<sub>2</sub>+P<sub>4</sub> (representing secretory phase) vs. E<sub>2</sub> (representing proliferative phase) that also confirm results from the tissue samples.

### Supplemental Figures:

#### **Supplemental Figure 1.**

Density plot of all CpG sites'  $\beta$ -values for each sample. One MSE sample shown in red, had an overall different plot and was eliminated from analysis.

#### **Supplemental Figure 2.**

Global DNA methylation pattern of endometrium based on both DNA methylation levels and CpG site location within or outside CpG islands.

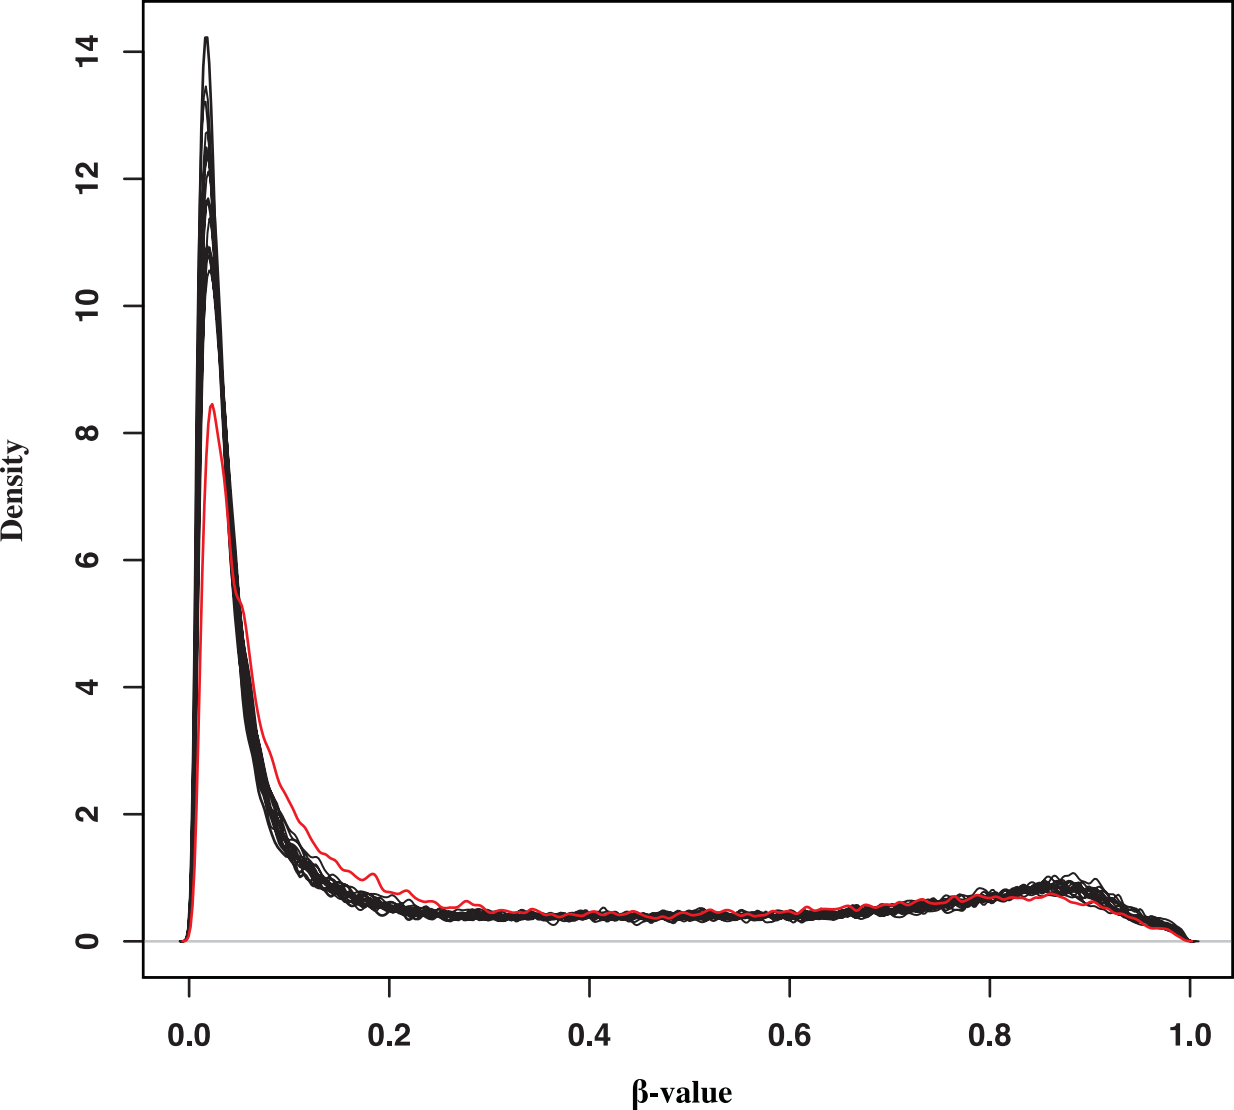

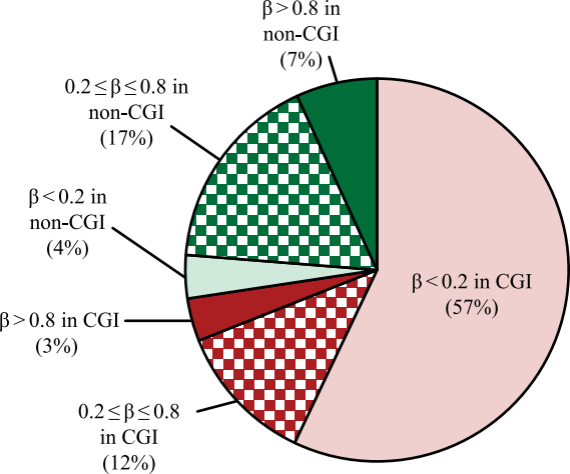

Supplement: me-13-1340.pdf [file me-13-1340.pdf]
